# Supplementary material for: A Recognition-Molecule-Free Photoelectrochemical Sensor Based on Ti3C2/TiO2 Heterostructure for Monitoring of Dopamine
Source: MDPI journal article supplement (doi:10.3390/bios13050526), 2023-05-07
Supplement: s1 [file s1]

# A recognition-molecule-free photoelectrochemical sensor based on $\text{Ti}_3\text{C}_2/\text{TiO}_2$ heterostructure for monitoring of dopamine

Zhifang Wu <sup>1</sup>, Fangjie Han <sup>1</sup>, Tianqi Wang <sup>1</sup>, Liwei Guan <sup>1</sup>, Zhishan Liang <sup>1</sup>, Dongxue Han<sup>\*1, 2</sup>, and Li Niu <sup>1</sup>

1 School of Economics and Statistics c/o Center for Advanced Analytical Science, School of Chemistry and Chemical Engineering, Guangzhou Key Laboratory of Sensing Materials & Devices, Guangzhou University, Guangzhou 510006, P. R. China.

2. Guangdong Provincial Key Laboratory of Psychoactive Substances Monitoring and Safety, Anti-Drug Technology Center of Guangdong Province, Guangzhou 510230, PR China.

\* Correspondence: dxhan@gzhu.edu.cn

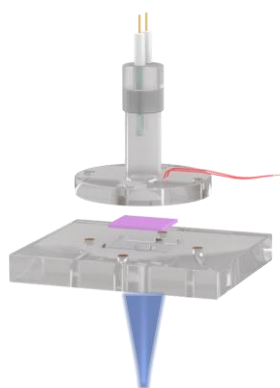

Figure S1 Picture of homemade photoelectric detection cell.

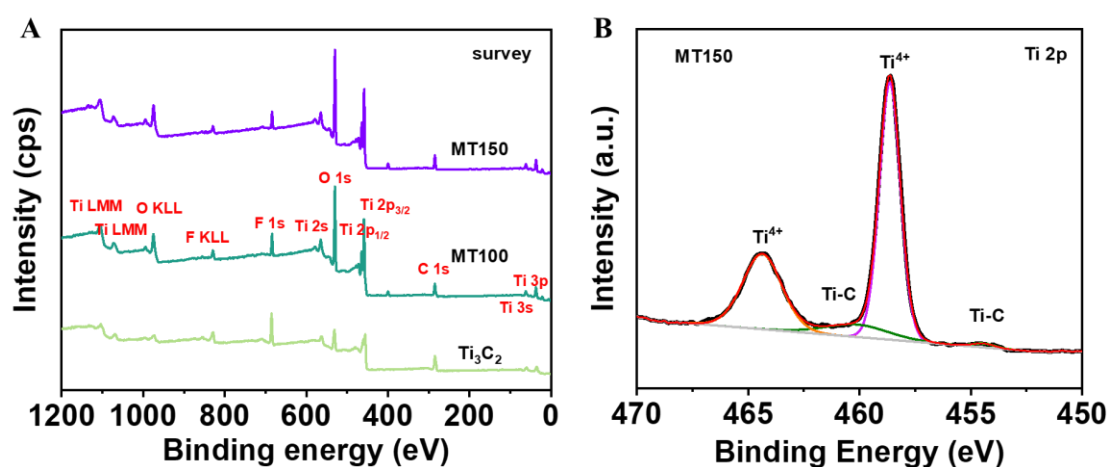

Figure S2 (A) XPS survey spectrum of  $\text{Ti}_3\text{C}_2$ , MT100, and MT150. (B) High-resolution Ti 2p XPS spectra of the MT150.

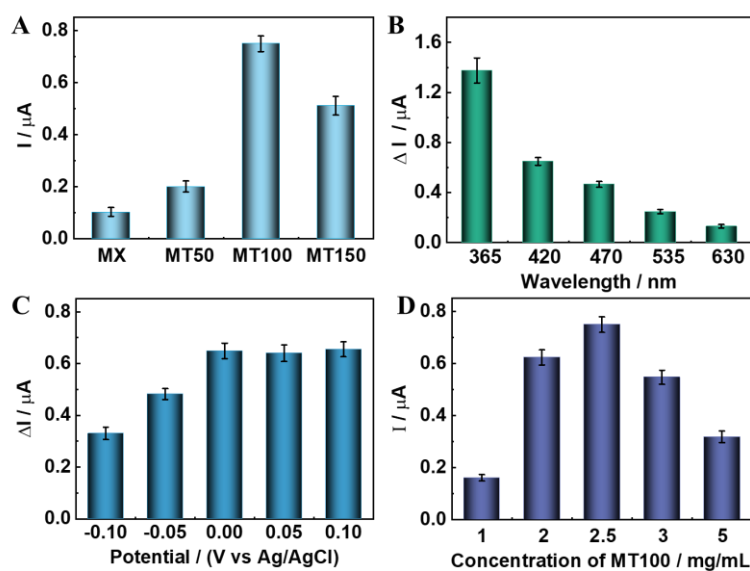

Figure S3. Effects of (A) different degrees of oxidation of  $Ti_3C_2$ , (B) excitation wavelength, (C) the applied potential and (D) the concentration of MT100 on photocurrent response of MT100-modified FTO electrode in 0.1M PBS (pH=7.40) containing 50  $\mu M$  DA.

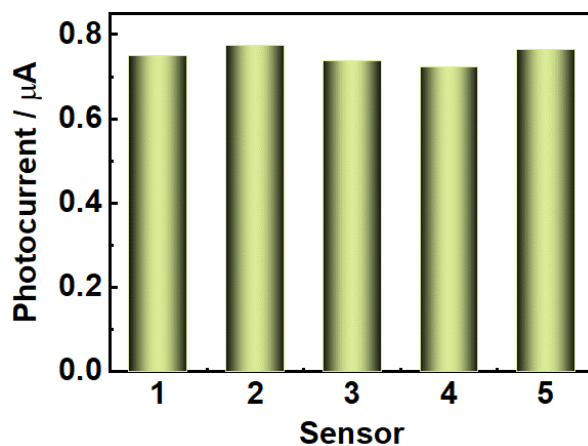

Figure S4 Repeatability of five MT100 photoelectrodes for detection of 50  $\mu M$  DA.

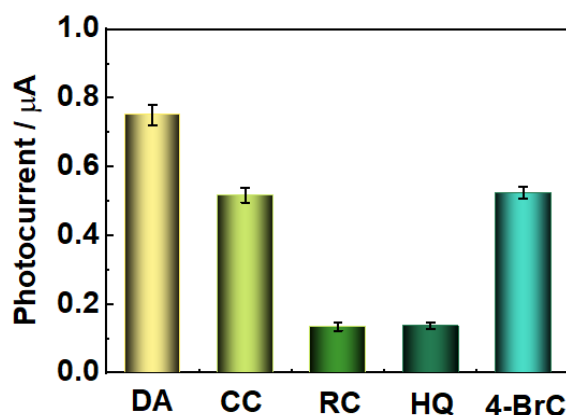

Figure S5. Photocurrent response of some other catechins derivatives on the MT100-based sensor.

Table S1 Comparison of previous and current DA detection methods

| Material                                              | Method | Linear range ( $\mu\text{M}$ ) | Limit of detection ( $\mu\text{M}$ ) | Refs      |
|-------------------------------------------------------|--------|--------------------------------|--------------------------------------|-----------|
| BiVO <sub>4</sub> /FeOOH                              | PEC    | 0.2–40 and 40–1400             | 0.09                                 | 1         |
| GDY@TiO <sub>2</sub>                                  | PEC    | 0.5–500                        | 0.136                                | 2         |
| Cu <sub>2</sub> O@CdTe QDs                            | PEC    | 0.001–0.100                    | 0.0003                               | 3         |
| DE-TiO <sub>2</sub> NTPCs                             | PEC    | 0.01–2                         | 0.002                                | 4         |
| WS <sub>2</sub> /TiO <sub>2</sub>                     | PEC    | 0.99–48.78<br>72.29–333.33     | 0.32                                 | 5         |
| TiO <sub>2</sub> nanopore array                       | PEC    | 200–1500                       | 20                                   | 6         |
| Ti <sub>3</sub> C <sub>2</sub> @(001)TiO <sub>2</sub> | PEC    | 1–1000                         | 0.52                                 | 7         |
| ZnPc-P8BT-Pdots                                       | PEC    | 0.0025–125                     | 0.00169                              | 8         |
| Ti <sub>3</sub> C <sub>2</sub> /TiO <sub>2</sub>      | PEC    | 0.125–400                      | 0.045                                | This work |

#### References

1. Wang, Y.; Wang, D.; Dong, S.; Qiao, J.; Zeng, Z.; Shao, S., A visible-light-driven photoelectrochemical sensing platform based on the BiVO<sub>4</sub>/FeOOH photoanode for dopamine detection. *Electrochim. Acta* **2022**, *414*, 140207.
2. Xie, Y. Z.; Wang, Y.; Ma, Y.; Ye, J. S., Photoelectrochemical sensor based on carboxylated graphdiyne co-sensitized TiO<sub>2</sub> for sensitive detection of dopamine. *Materials Today Chemistry* **2022**, *26*, 101143.
3. Wang, C.; Chen, J.; Zhang, L.; Yang, Y.; Huang, M.; Chen, C.; Li, C.; Xie, Y.; Zhao, P.; Fei, J., An ultra-sensitive dopamine photoelectrochemical sensing platform based on two-dimensional Zn carbon nanosheets, hollow Cu<sub>2</sub>O and CdTe QDs composite films. *Carbon* **2022**, *198*, 101–109.
4. Wu, W.; Zhang, Z., Defect-engineered TiO<sub>2</sub> nanotube photonic crystals for the fabrication of near-infrared photoelectrochemical sensor. *J. Mater. Chem. B* **2017**, *5*, 4883–4889.
5. Ma, W.; Wang, L.; Zhang, N.; Han, D.; Dong, X.; Niu, L., Biomolecule-free, selective detection of o-diphenol and its derivatives with WS<sub>2</sub>/TiO<sub>2</sub>-based photoelectrochemical platform. *Anal. Chem.* **2015**, *87*, 4844–4850.
6. Tavella, F.; Ampelli, C.; Leonardi, S. G.; Neri, G., Photo-electrochemical sensing of dopamine by a novel porous TiO<sub>2</sub> array-modified screen-printed Ti electrode. *Sensors* **2018**, *18*, 3566.
7. Chen, Y.; Li, X.; Cai, G.; Li, M.; Tang, D., In situ formation of (001)TiO<sub>2</sub>/Ti<sub>3</sub>C<sub>2</sub> heterojunctions for enhanced photoelectrochemical detection of dopamine. *Electrochem. Commun.* **2021**, *125*, 106987.
8. Peng, J.; Li, X.; Liu, Y.; Zhuge, W.; Zhang, C.; Huang, Y.,

---

Photoelectrochemical sensor based on zinc phthalocyanine semiconducting polymer dots for ultrasensitive detection of dopamine. *Sensors and Actuators B: Chemical* **2022**, 360.
